# Supplementary material
Source: Springer Nature journal article supplement (https://www.springermedizin.de/resource/supplementary/12913_2014_3528_MOESM3_ESM.pdf/9533118)
Supplement: MOESM3 [file 9533118]

**Initiation**

- ✓ Develop communication platform
- ✓ Build & train teams
- ✓ Sensitize stakeholders
- ✓ Conceive messages
- ✓ Develop registration forms
- ✓ Determine appropriate equitable costs

**Implementation**

- ✓ Confidentiality
- ✓ Health worker participation
- ✓ Hospital-based programme
- ✓ Personalised communication
- ✓ Demonstrate clear benefits
- ✓ Use trial period

**Sustainability**

- ✓ Seed funds
- ✓ Participant contributions
- ✓ Grants
- ✓ Community raised funds

**Monitoring**

- ✓ Participation rate
- ✓ Satisfaction
- ✓ Cost
- ✓ Measures of community ownership
- ✓ Feedback
- ✓ Clinical outcomes
